# Supplementary material for: Therapeutic Innovation from Plant-Derived Thai Herbal Extracts: α-Glucosidase Inhibitory Activity, Mechanistic Insights and Formulation Potential of the Selected Thai Rejuvenation Remedy
Source: MDPI journal article supplement (doi:10.3390/life16071084), 2026-06-28
Supplement: s1 [file life-4326150-supplementary.pdf › life-4326150-supplementary.pdf]

Supplementary file

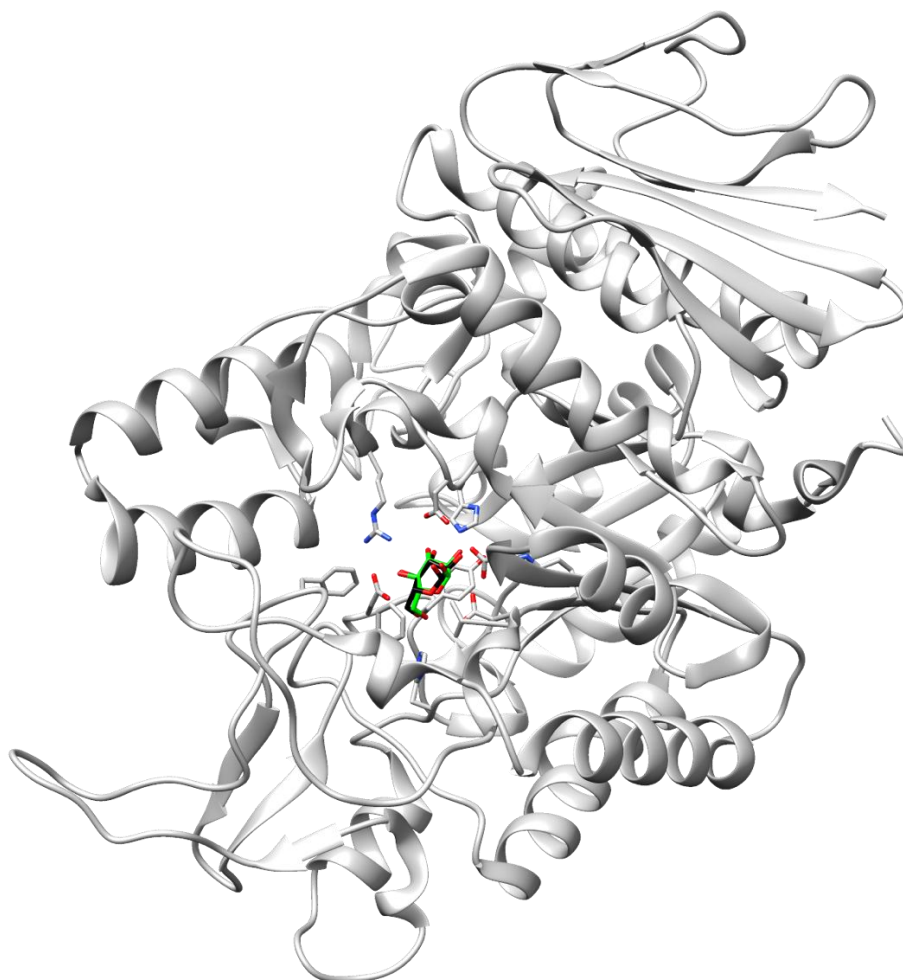

**Figure S1.** Molecular docking validation outcome from the established docking protocol used in this study. The RMSD value of the redocked ligand, in black, is 2.288 Å compared to the ligand's original pose (co-crystal structure position), presented in green. The accepted criterion for redocking validation is a distance of less than 3 Å.
